# Supplementary material for: Activation-induced cytidine deaminase acts as a mutator in BCR-ABL1–transformed acute lymphoblastic leukemia cells
Source: PubMed Central journal article supplement — J Exp Med. 2007 May 14;204(5):1157–66. doi: 10.1084/jem.20062662 (PMC2118573; doi:10.1084/jem.20062662), 2007-05-14
Supplement: jexpmed_jem.20062662_3.pdf [file jexpmed_jem.20062662_3.pdf]

**Table S1.** V<sub>H</sub> region genes in human Ph<sup>-</sup> ALL cells

| Case | V <sub>H</sub> | D <sub>H</sub> | J <sub>H</sub> | Mutation frequency<br>[per 10 <sup>3</sup> bp] | Cytogenetics                          | Genes involved                    |
|------|----------------|----------------|----------------|------------------------------------------------|---------------------------------------|-----------------------------------|
| 1    | V6-1           | D2-2           | J4             | 0                                              | Hyperdiploid                          | N.N.                              |
| 2    | V4-61          | none           | J4             | 26                                             | t(9;15)(p2;q1)                        | N.N.                              |
| 3    | V3-13          | D2-15          | J5             | 0                                              | Hyperdiploid                          | N.N.                              |
| 4    | V3-66          | none           | J4             | 67                                             | Hyperdiploid ; del(6)(q2)             | N.N.                              |
| 5    | V4-34          | none           | J6             | 0                                              | Hyperdiploid                          | N.N.                              |
| 6    | V4-34          | D3-22          | J4             | 30                                             | del(6)(q2q5)                          | N.N.                              |
| 7    | V4-39          | D3-22          | J6             | 4                                              | Hyperdiploid, trisomy 14              | N.N.                              |
| 8    | V4-59          | D3-10          | J6             | 0                                              | Hyperdiploid                          | N.N.                              |
| 9    | V3-64          | none           | J5             | 19                                             | t(17;22)(q25;q11)                     | <i>BCR</i> locus                  |
|      | V7-4           | D6-19          | J2             | 22                                             |                                       |                                   |
|      | V1-18          | D3-3           | J6             | 11                                             |                                       |                                   |
| 10   | V3-33          | D2-2           | J6             | 0                                              | t(3;12)(p11;p13)                      | <i>TEL</i> rearranged             |
|      | V4-4           | none           | J1             | 4                                              |                                       |                                   |
| 11   | V4-34          | D1-20          | J4             | 0                                              | Hyperdiploid                          | N.N.                              |
| 12   | V1-3           | D6-6           | J5             | 0                                              | Hyperdiploid                          | N.N.                              |
| 13   | V6-1           | D2-8           | J6             | 4                                              | Hyperdiploid                          | N.N.                              |
| 14   | V5-a           | D2-15          | J6             | 4                                              | t(4;11)(q21;q23)                      | <i>MLL-AF4</i>                    |
| 15   | V3-74          | D2-2           | J4             | 0                                              | t(1;12)(p32;p12),t(7;7)(q22;q36)      | <i>TEL</i> rearranged             |
| 16   | V3-33          | none           | J6             | 0                                              | no gross abnormality                  | N.N.                              |
| 17   | V6-1           | D2-21          | J6             | 0                                              | t(2;14)(q23;q32); t(12;21)(p13;q22)   | <i>IGH</i> locus; <i>TEL-AML1</i> |
| 18   | V6-1           | D3-10          | J6             | 0                                              | Hyperdiploid                          | N.N.                              |
| 19   | V4-34          | D3-16          | J4             | 4                                              | Hyperdiploid                          | N.N.                              |
| 20   | V1-3           | none           | J4             | 4                                              | del1(q?)                              | N.N.                              |
| 21   | V2-5           | D5-12          | J5             | 7; 69-bp in V <sub>H</sub>                     | Hyperdiploid                          | N.N.                              |
| 22   | V2-70          | D3-10          | J4             | 4                                              | der(9)t(9;22)(p11;q11)                | <i>BCR</i> locus                  |
| 23   | V3-9           | D3-3           | J6             | 7                                              | Hyperdiploid                          | N.N.                              |
| 24   | V1-58          | none           | J6             | 4, 70-bp in V <sub>H</sub>                     | Hyperdiploid                          | N.N.                              |
| 25   | V2-5           | D2-15          | J4             | 0                                              | Hyperdiploid                          | N.N.                              |
| 26   | V2-5           | D3-10          | J6             | 7                                              | t(11;19)(q23;p13.3)                   | <i>MLL-ENL</i>                    |
| 27   | V3-23          | D2-2           | J6             | 4                                              | Hyperdiploid                          | N.N.                              |
| 28   | V2-5           | D3-10          | J6             | 0                                              | Hyperdiploid                          | N.N.                              |
| 29   | V4-34          | D6-19          | J4             | 4                                              | Hyperdiploid                          | N.N.                              |
| 30   | V3-53          | D2-21          | J4             | 4                                              | Hyperdiploid                          | N.N.                              |
| 31   | V6-1           | D2-2           | J6             | 0                                              | Hyperdiploid                          | N.N.                              |
| 32   | V4-34          | D3-9           | J6             | 0                                              | no gross abnormality                  | N.N.                              |
| 33   | V1-8           | D3-3           | J4             | 4                                              | t(1;19)(q23;p13)                      | <i>E2A-PBX1</i>                   |
|      | V3-66          | D2-2           | J4             | 0                                              |                                       |                                   |
| 34   | V2-70          | D3-10          | J6             | 0                                              | der(12)t(12;14)(p12;q11)              | <i>TEL</i> rearranged             |
| 35   | V6-1           | D2-2           | J6             | 0                                              | del(10)(p11)                          | N.N.                              |
| 36   | V3-21          | none           | J6             | 0                                              | del(9)(p11),del(17)(p11)              | N.N.                              |
| 37   | V3-9           | D2-15          | J4             | 0                                              | Hyperdiploid                          | N.N.                              |
| 38   | V3-30          | D3-10          | J6             | 0                                              | Hyperdiploid                          | N.N.                              |
| 39   | V2-5           | D2-2           | J3             | 0                                              | t(12;21)(p13;q22)                     | <i>TEL-AML1</i>                   |
|      | V3-15          | D3-19          | J6             | 4                                              |                                       |                                   |
| 40   | V4-34          | D2-15          | J6             | 4                                              | t(12;21)(p13;q22)                     | <i>TEL-AML1</i>                   |
|      | V4-39          | none           | J6             | 0                                              |                                       |                                   |
| 41   | V3-13          | D3-22          | J6             | 7                                              | t(4;11)(q21;q23)                      | <i>MLL-AF4</i>                    |
|      | V2-5           | D2-2           | J6             | 0                                              |                                       |                                   |
| 42   | V3-20          | D2-8           | J5             | 0                                              | t(4;11)(q21;q23)                      | <i>MLL-AF4</i>                    |
|      | V6-1           | D1-7           | J4             | 0                                              |                                       |                                   |
| 43   | V3-15          | D3-10          | J6             | 4                                              | t(12;21)(p13;q22), t(16;21)(q24 ;q22) | <i>TEL-AML1</i>                   |
| 44   | V4-34          | D3-22          | J2             | 0                                              | t(1;19)(q23;p13), del(6)(q21)         | <i>E2A-PBX1</i>                   |
|      | V2-26          | D2-2           | J4             | 4                                              |                                       |                                   |
| 45   | V3-7           | D3-10          | J4             | 4                                              | t(1;19)(q23;p13), t(3;14)(q27;q24)    | <i>E2A-PBX1</i>                   |
| 46   | V3-15          | D3-16          | J5             | 0                                              | t(1;19)(q23;p13); t(9;9)(q21;q11)     | <i>E2A-PBX1</i>                   |
| 47   | V1-69          | D3-10          | J6             | 7                                              | t(5 ;12)(q33 ;p13)                    | <i>TEL-PDGFRB</i>                 |
| 48   | V6-1           | D5-5           | J6             | 0                                              | Hyperdiploid                          | N.N.                              |
|      | V4-59          | D2-8           | J6             | 0                                              |                                       |                                   |
| 49   | V1-8           | J5             | 34             |                                                | Hyperdiploid                          | N.N.                              |
| 50   | V1-8           | D2-15          | J6             | 0                                              | Hyperdiploid                          | N.N.                              |
| 51   | V3-13          | D3-22          | J6             | 4                                              | Hyperdiploid                          | N.N.                              |
| 52   | V1-18          | D3-10          | J4             | 0                                              | Hyperdiploid                          | N.N.                              |
| 53   | V3-23          | D3-16          | J4             | 0                                              | Hyperdiploid                          | N.N.                              |
| 54   | V3-9           | D3-22          | J4             | 0                                              | Hyperdiploid                          | N.N.                              |
| 55   | V1-18          | D2-8           | J6             | 0                                              | Hyperdiploid                          | N.N.                              |
| 56   | V3-15          | D2-2           | J4             | 7                                              | Hyperdiploid                          | N.N.                              |
| 57   | V1-2           | D3-22          | J5             | 0                                              | Hyperdiploid                          | N.N.                              |
| 58   | V6-1           | D3-16          | J4             | 0                                              | Hyperdiploid                          | N.N.                              |
| 59   | V1-45          | D3-9           | J5             | 7                                              | Hyperdiploid                          | N.N.                              |
| 60   | V3-53          | D6-19          | J6             | 10                                             | Hyperdiploid                          | N.N.                              |

Mean ± S.E.M.: 4.85 ± 1.23 mutations per 10<sup>3</sup> bp

Cases 1–9 were previously described (Height, S.E., G.J. Swansbury, E. Matutes, J.G. Treleaven, D. Catovsky, and M.J. Dyer. 1996. *Blood*. 87:5242–5250). Sequence data were reanalyzed based on the full sequence of human germline *IGHV* genes according to Matsuda et al. (Matsuda, F., K. Ishii, P. Bourvagnet, K. Kuma, H. Hayashida, T. Miyata, and T. Honjo. 1998. *J. Exp. Med.* 188:2151–2162). Cases 1–40 and 49–60 are primary cases of Ph<sup>-</sup> leukemia. Cases 41–48 represent leukemia cell lines BEL1 (41), RS4;11 (42), REH (43), 697 (44), Kasumi-2 (45), MHH-CALL3 (46), Nalm-6 (47), and HPB-Null (48). Deletions were counted as one mutation.

**Table S2.** V<sub>H</sub> region genes in human Ph<sup>+</sup> ALL cells

| Case | V <sub>H</sub> | D <sub>H</sub> | J <sub>H</sub> | Mutation frequency<br>[per 10 <sup>3</sup> bp] | Cytogenetics                                           | Genes involved  |
|------|----------------|----------------|----------------|------------------------------------------------|--------------------------------------------------------|-----------------|
| 1    | V3-66          | D3-3           | J4             | 44                                             | t(9;22)(q34;q11)                                       | <i>BCR-ABL1</i> |
| 2    | V3-49          | D2-21          | J4             | 78                                             | t(9;22)(q34;q11), add(2)(q37), add(4)(q33)             | <i>BCR-ABL1</i> |
|      | V3-48          | D6-13          | J4             | 181                                            |                                                        |                 |
| 3    | V4-30          | D4-23          | J6             | 26                                             | t(9;22)(q34;q11)                                       | <i>BCR-ABL1</i> |
| 4    | V2-70          | D2-2           | J6             | 30; 87-bp in V <sub>H</sub>                    | t(9;22)(q34;q11), add(9)(p2)                           | <i>BCR-ABL1</i> |
| 5    | V4-59          | D3-9           | J4             | 0                                              | t(9;22)(q34;q11), +15, +18                             | <i>BCR-ABL1</i> |
| 6    | V1-18          | D3-3           | J3             | 15                                             | t(9;22)(q34;q11)                                       | <i>BCR-ABL1</i> |
|      | V3-74          | D4-17          | J4             | 11                                             |                                                        |                 |
|      | V3-7           | D6-13          | J4             | 37                                             |                                                        |                 |
|      | V3-53          | D3-22          | J6             | 59                                             |                                                        |                 |
| 7    | V4-31          | D2-2           | J4             | 48                                             | t(2;9;22)(p11;q34;q11)                                 | <i>BCR-ABL1</i> |
| 8    | V4-34          | D5-12          | J2             | 63                                             | t(9;22)(q34;q11), +der(22)                             | <i>BCR-ABL1</i> |
|      | V4-31          | D2-2           | J4             | 48                                             |                                                        |                 |
| 9    | V3-7           | D6-13          | J5             | 15                                             | t(9;22)(q34;q11), i(17)(p10)                           | <i>BCR-ABL1</i> |
|      | V1-2           | none           | J5             | 15                                             |                                                        |                 |
|      | V3-74          | D3-3           | J5             | 48                                             |                                                        |                 |
| 10   | V3-49          | D7-27          | J6             | 81                                             | t(9;22)(q34;q11)                                       | <i>BCR-ABL1</i> |
|      | V1-46          | D5-5           | J4             | 22                                             |                                                        |                 |
| 11   | V3-49          | none           | J5             | 78                                             | t(9;22)(q34;q11), add(3)(q29), +mar                    | <i>BCR-ABL1</i> |
| 12   | V4-34          | D6-13          | J5             | 15                                             | t(9;22)(q34;q11)                                       | <i>BCR-ABL1</i> |
| 13   | V4-61          | D2-2           | J4             | 0                                              | t(9;22)(q34;q11)                                       | <i>BCR-ABL1</i> |
| 14   | V3-33          | D3-22          | J4             | 0                                              | t(9;22)(q34;q11)                                       | <i>BCR-ABL1</i> |
| 15   | V5-51          | D3-22          | J4             | 15                                             | t(9;22)(q34;q11)                                       | <i>BCR-ABL1</i> |
|      | V5-51          | D6-19          | J3             | 11                                             | t(9;22)(q34;q11)                                       | <i>BCR-ABL1</i> |
| 16   | V5-51          | D1-26          | J1             | 19                                             | t(9;22)(q34;q11)                                       | <i>BCR-ABL1</i> |
| 17   | V3-30          | D3-22          | J3             | 15                                             | t(9;22)(q34;q11)                                       | <i>BCR-ABL1</i> |
| 18   | V1-46          | D6-13          | J4             | 0                                              | t(9;22)(q34;q11)                                       | <i>BCR-ABL1</i> |
|      | V1-2           | D3-10          | J5             | 15                                             | t(9;22)(q34;q11)                                       | <i>BCR-ABL1</i> |
| 19   | V2-5           | D3-22          | J3             | 11                                             | t(9;22)(q34;q11)                                       | <i>BCR-ABL1</i> |
| 20   | V1-46          | D3-10          | J5             | 22                                             | t(9;22)(q34;q11)                                       | <i>BCR-ABL1</i> |
| 21   | V1-18          | D2-2           | J6             | 26; ID                                         | t(9;22)(q34;q11)                                       | <i>BCR-ABL1</i> |
|      | V3-21          | D6-25          | J6             | 15                                             |                                                        |                 |
| 22   | V1-3           | D1-14          | J4             | 7; ID                                          |                                                        |                 |
|      | V3-7           | D2-2           | J6             | 15; ID                                         | t(9;22)(q34;q11)                                       | <i>BCR-ABL1</i> |
|      | V3-30          | D5-5           | J4             | 41                                             |                                                        |                 |
| 23   | V1-8           | D5-18          | J6             | 0                                              | t(9;22)(q34;q11)                                       | <i>BCR-ABL1</i> |
|      | V1-46          | D2-21          | J5             | 133; ID                                        |                                                        |                 |
| 24   | V3-33          | D2-2           | J4             | 89; ID                                         | t(9;22)(q34;q11)                                       | <i>BCR-ABL1</i> |
|      | V3-30          | D6-6           | J4             | 78; ID                                         |                                                        |                 |
|      | V3-33          | D1-20          | J5             | 0                                              |                                                        |                 |
|      | V3-30          | D2-15          | J6             | 63; ID                                         |                                                        |                 |
| 25   | V2-5           | none           | J5             | 7                                              | t(9;22)(q34;q11)                                       | <i>BCR-ABL1</i> |
| 26   | V3-21          | D2-15          | J3             | 22; ID                                         | t(9;22)(q34;q11), add(1)(q42), add(8)(p23), +mar       | <i>BCR-ABL1</i> |
| 27   | V4-34          | D2-8           | J2             | 22                                             | t(9;22)(q34;q11), t(6;7)(q24;q35), del(11)(q22.3)      | <i>BCR-ABL1</i> |
|      | V3-74          | none           | J5             | 137; ID                                        |                                                        |                 |
| 28   | V3-43          | none           | J4             | 11                                             | t(9;22)(q34;q11), -3, -13, -18, del(9)(p11),           | <i>BCR-ABL1</i> |
|      | V6-1           | D3-9           | J6             | 22                                             | t(15;18)(q21;q12)                                      |                 |
| 29   | V1-8           | none           | J2             | 37; ID                                         | t(9;22)(q34;q11), dup(13)(q21)                         | <i>BCR-ABL1</i> |
|      | V2-70          | D3-16          | J4             | 26; ID                                         |                                                        |                 |
|      | V3-43          | D3-9           | J5             | 11                                             |                                                        |                 |
|      | V3-9           | D2-21          | J5             | 22; ID                                         |                                                        |                 |
|      | V4-31          | D3-16          | J4             | 26; ID                                         |                                                        |                 |
|      | V4-59          | D3-16          | J4             | 22; ID                                         |                                                        |                 |
| 30   | V1-46          | none           | J4             | 22                                             | t(9;22)(q34;q11)                                       | <i>BCR-ABL1</i> |
|      | V3-30          | none           | J5             | 44                                             |                                                        |                 |
|      | V3-30          | D6-13          | J3             | 41; ID                                         |                                                        |                 |
|      | V4-34          | none           | J5             | 52                                             |                                                        |                 |
| 31   | V1-2           | D2-2           | J6             | 70; ID                                         | t(9;22)(q34;q11), t(1;1)(p11;q31), t(1;4)(q11;q35)     | <i>BCR-ABL1</i> |
|      | V3-53          | D2-8           | J6             | 11                                             | add(10)(q25), del(14)(q23q31), t(9;16)(q11;p13)        |                 |
|      | V4-4           | none           | J6             | 44                                             |                                                        |                 |
| 32   | V1-69          | D3-22          | J6             | 15                                             | t(9;22)(q34;q11), +8, +16, del(7)(p14), del(9)(q13q34) | <i>BCR-ABL1</i> |
|      | V4-55          | D3-22          | J6             | 7                                              |                                                        |                 |
| 33   | V1-2           | D2-21          | J5             | 144                                            | t(9;22)(q34;q11)                                       | <i>BCR-ABL1</i> |
| 34   | V1-3           | D5-24          | J6             | 96; ID                                         | t(9;22)(q34;q11)                                       | <i>BCR-ABL1</i> |
| 35   | V1-3           | D2-21          | J6             | 11                                             | t(9;22)(q34;q11)                                       | <i>BCR-ABL1</i> |
| 36   | V1-45          | D1-26          | J3             | 141                                            | t(9;22)(q34;q11)                                       | <i>BCR-ABL1</i> |
| 37   | V3-43          | D1-26          | J4             | 7                                              | t(9;22)(q34;q11)                                       | <i>BCR-ABL1</i> |
| 38   | V3-43          | D3-9           | J5             | 0                                              | t(9;22)(q34;q11)                                       | <i>BCR-ABL1</i> |
| 39   | V1-3           | D3-10          | J5             | 0                                              | t(9;22)(q34;q11)                                       | <i>BCR-ABL1</i> |
| 40   | V1-2           |                | J4             | 30; ID                                         | t(9;22)(q34;q11)                                       | <i>BCR-ABL1</i> |
| 41   | V3-11          | D3-16          | J6             | 7                                              | t(9;22)(q34;q11)                                       | <i>BCR-ABL1</i> |
| 42   | V1-69          | D3-9           | J4             | 7                                              | t(9;22)(q34;q11)                                       | <i>BCR-ABL1</i> |
| 43   | V3-66          | D3-22          | J4             | 4                                              | t(9;22)(q34;q11)                                       | <i>BCR-ABL1</i> |
| 44   | V1-2           | D2-2           | J4             | 7                                              | t(9;22)(q34;q11)                                       | <i>BCR-ABL1</i> |
| 45   | V1-46          | D1-20          | J4             | 0                                              | t(9;22)(q34;q11)                                       | <i>BCR-ABL1</i> |
| 46   | V1-2           | D3-16          | J4             | 7                                              | t(9;22)(q34;q11)                                       | <i>BCR-ABL1</i> |

Mean ± S.E.M.: 34.45 ± 4.42 mutations per 10<sup>3</sup> bp

Cases 1–10 were previously described (Height, S.E., G.J. Swansbury, E. Matutes, J.G. Treleaven, D. Catovsky, and M.J. Dyer. 1996. *Blood*. 87:5242–5250). Sequence data were reanalyzed based on the full sequence of human germline *IGHV* genes according to Matsuda et al. (Matsuda, F., K. Ishii, P. Bourvagnet, K. Kuma, H. Hayashida, T. Miyata, and T. Honjo. 1998. *J. Exp. Med.* 188:2151–2162). Cases 1–25 and 33–46 are primary cases of Ph<sup>+</sup> leukemia. Cases 21–25 represent lymphoid blast crisis of chronic myeloid leukemia (LBC cases in Table II and Table S3). Cases 26–32 represent cell lines BV173 (26), CMLT1

(27), K562 (28), Nalm1 (29), SD1 (30), SUP-B15 (31), and TOM1 (32). Intraclonal diversity (ID) denotes the presence of multiple sequences for one VH gene rearrangement, which share common mutations but differ in diversifying mutations. Deletions were counted as one mutation. N.N., unknown

**Table S3.** Somatic mutations within non-Ig loci

| Cell type<br><i>TCRG</i>              | <i>BCL6</i> <sup>a</sup> |                                   | <i>MYC</i> <sup>a</sup> |                | <i>TCRB</i>        |                |
|---------------------------------------|--------------------------|-----------------------------------|-------------------------|----------------|--------------------|----------------|
|                                       | Mutation frequency       | Mutation Mutated frequency clones | Mutation frequency      | Mutated clones | Mutation frequency | Mutated clones |
| BV173                                 | 1.41                     | 6/9                               | 0.91                    | 2/13           | germline           |                |
| 6.05 <sup>b</sup>                     | 4/4                      |                                   |                         |                |                    |                |
| CMLT1 <sup>c</sup>                    | 2.31                     | 15/22                             | 1.05                    | 4/9            | 11.56 <sup>d</sup> | 4/4            |
| 7.44 <sup>b</sup>                     | 3/5                      |                                   |                         |                |                    |                |
| NALM1                                 | 0.36                     | 3/15                              | 0.47                    | 2/7            | germline           |                |
| 5.15 <sup>b</sup>                     | 2/4                      |                                   |                         |                |                    |                |
| SD1                                   | 0.84                     | 5/13                              | 0.09                    | 1/16           | n.d.               |                |
| n.d.                                  |                          |                                   |                         |                |                    |                |
| SUP-B15                               | 0.49                     | 3/11                              | 0.24                    | 2/13           | n.d.               |                |
| n.d.                                  |                          |                                   |                         |                |                    |                |
| TOM1                                  | 0.72                     | 6/15                              | 0                       | 0/7            | germline           |                |
| n.d.                                  |                          |                                   |                         |                |                    |                |
| LBCII                                 | 1.12                     | 12/16                             | 1.21                    | 2/4            | germline           |                |
| 0                                     | 0/2                      |                                   |                         |                |                    |                |
| LBCIII                                | 2.10                     | 13/20                             | 0.40                    | 2/9            | 8.67 <sup>d</sup>  | 4/5            |
| 2.23 <sup>b</sup>                     | 2/4                      |                                   |                         |                |                    |                |
| LBCIV                                 | 0                        | 0/14                              | 0.18                    | 1/10           | 2.52 <sup>d</sup>  | 3/6            |
| 7.45 <sup>b</sup>                     | 6/6                      |                                   |                         |                |                    |                |
| LBCV                                  | 1.31                     | 11/19                             | n.d.                    | n.d.           | 2.21 <sup>d</sup>  | 3/3            |
| 0                                     | 0/4                      |                                   |                         |                |                    |                |
| Ph <sup>+</sup> ALL                   | 1.07 ± 0.23              | 74/154                            | 0.51 ± 0.15             | 16/88          | 6.21 ± 2.31        | 14/18          |
| 5.66 ± 0.96                           | 17/29                    |                                   |                         |                |                    |                |
| Mutated cases                         | 7/10                     |                                   | 3/9                     |                | 4/4                |                |
| 5/7                                   |                          |                                   |                         |                |                    |                |
| 697                                   | 0                        | 0/11                              | 0                       | 0/8            | n.d.               |                |
| n.d.                                  |                          |                                   |                         |                |                    |                |
| HBP-NULL                              | 0.56                     | 2/8                               | 0.56                    | 4/10           | n.d.               |                |
| n.d.                                  |                          |                                   |                         |                |                    |                |
| NALM6                                 | 0                        | 0/4                               | 0                       | 0/8            | germline           |                |
| germline                              |                          |                                   |                         |                |                    |                |
| REH                                   | 0                        | 0/7                               | 0.13                    | 2/8            | n.d.               |                |
| n.d.                                  |                          |                                   |                         |                |                    |                |
| RS4.11                                | 0                        | 0/14                              | 0.11                    | 1/10           | germline           |                |
| germline                              |                          |                                   |                         |                |                    |                |
| Ph <sup>-</sup> ALL                   | 0.11 ± 0.11              | 2/44                              | 0.16 ± 0.11             | 7/44           |                    |                |
| Mutated cases                         | 1/5                      |                                   | 1/5                     |                | not applicable     |                |
| not applicable                        |                          |                                   |                         |                |                    |                |
| CD3 <sup>+</sup> T cells <sup>e</sup> | n.d.                     |                                   | n.d.                    |                | 0.17 ± 0.14        | 2/30           |
| 0.18 ± 0.18                           | 1/16                     |                                   |                         |                |                    |                |

<sup>a</sup>*BCL6* and *MYC* alleles were amplified by PFU DNA polymerase and sequenced from both DNA strands. *BCL6* or *MYC* alleles amplified from ALL cases were considered mutated if at least two mutated sequences were amplified per case with an average mutation frequency of all amplified sequences significantly ( $P < 0.01$ ) above the error rate of PFU DNA polymerase.

<sup>b</sup>The following *TCRG* gene rearrangements were amplified and sequenced: V3-1 J2 (1 mutation) and V8-1 Jp1 (2 mutations) from subclones of BV173; V4-2 J2 (0 mutations), and V4-2 J1 (1 mutation) from CMLT1; V5-1 J2 (2 mutations) and V5-1 Jp1 (unmutated) from subclones of NALM1; V3-1 J2-1 (unmutated) from LBCII; V3-1 J2 (unmutated) and V8-1 J2 (1 mutation) from LBCIII; V2-2 J2 (3 mutations) and V4-2 J2 (1 mutation) from LBCIV; and V3-1 J2 and V4-2 J2 (both unmutated) from LBC V.

<sup>c</sup>CMLT1 are heterogenous with respect to expression of B cell (CD19), T cell (CD3) and myeloid (CD13) antigens. For this experiment, CD19<sup>+</sup> CD13<sup>-</sup> cells were sorted and analyzed.

<sup>d</sup>The following *TCRB* gene rearrangements were amplified and sequenced: V4-2 D2 J2-3 (3 mutations) and V18-1 D2 D2-7 (5 mutations, with intraclonal diversity) from CMLT1 cells; V6-5 D1 J1-1 (1 mutation), V20 D1 J1-2 (0 mutation), and V28 D2 J2-5 (8 mutations, with intraclonal diversity) from case LBCIII; V28 D2 J2-7 (0 mutation) and V12-5 DD2 J2-3 (3 mutations) from case LBCIV; and V20-1 D2 J2-7 (1 mutation) and a *TCRB* germline allele were amplified from case LBCV.

<sup>e</sup>As control for Taq DNA polymerase error, *TCRB* and *TCRG* gene rearrangements were amplified and sequenced from normal peripheral blood T cells. *TCRB* and *TCRG* gene rearrangements amplified from ALL cases were considered mutated if at least two mutated sequences were amplified per case with an average mutation frequency of all amplified sequences significantly ( $P < 0.01$ ) above the error rate of Taq DNA polymerase.

**Table S4.** Summary of oligonucleotides used for DNA-mutation analysis, RT-PCR, RNA interference and ligation-mediated PCR

***IGHV* and *IGHC* primers**

|                        |                                   |
|------------------------|-----------------------------------|
| V <sub>H</sub> 1 F     | 5' -CAGTCTGGGGCTGAGGTGAAGA-3'     |
| V <sub>H</sub> 2 F     | 5' -GTCCTRCGCTGGTCAAACCCACACA-3'  |
| V <sub>H</sub> 3 F     | 5' -GGGGTCCCTGAGACTCTCCTGTGCAG-3' |
| V <sub>H</sub> 4 F     | 5' -GACCCTGTCCCTCACCTGCRCTGTC-3'  |
| V <sub>H</sub> 5 F     | 5' -AAAAAGCCCCGGGGAGTCTCTGARGA-3' |
| V <sub>H</sub> 6 F     | 5' -ACCTGTGCCATCTCCGGGGACAGTG-3'  |
| J <sub>H</sub> 1.4.5 R | 5' -GACGGTGACCAGGGTKCCCTGGCC-3'   |
| J <sub>H</sub> 2 R     | 5' -GACAGTGACCAGGGTGCCACGGCC-3'   |
| J <sub>H</sub> 3 R     | 5' -GACGGTGACCATTGTCCCTTGGCC-3'   |
| J <sub>H</sub> 6 R     | 5' -GACGGTGACCGTGGTCCCTTKGCC-3'   |
| C R                    | 5' -AGACGAGGGGGAAAAGGGTT-3'       |
| Cδ R                   | 5' -AGAGCTGGCTGCTTGTCATG-3'       |
| Cγ1 R                  | 5' -GAGTTTTGTCAACAAGATTTGGGCT-3'  |
| Cγ2 R                  | 5' -GCACTCGACACAACATTTGCG-3'      |
| Cγ3 R                  | 5' -TCACCAAGTGGGGTTTTGAGC-3'      |
| Cγ4 R                  | 5' -ATGGGCATGGGGGACCATTT-3'       |
| Cα2 R                  | 5' -TGTTGGCGGTTAGTGGGGTC-3'       |
| Cε R                   | 5' -GAGGTGGCATTGGAGGGAAT-3'       |

***TCRBV* and *TCRGV* primers**

|           |                                    |
|-----------|------------------------------------|
| TCRBV 1/5 | 5' -ACAGCAAGTGACDCTGAGATGCTC-3'    |
| TCRBV 2   | 5' -GAGTGCCGTTCCCTGGACTTTCAG-3'    |
| TCRBV 3   | 5' -GTAACCCAGAGCTCGAGATATCTA-3'    |
| TCRBV 4   | 5' -TCCAGTGTCAAGTCGATAGCCAAGTC-3'  |
| TCRBV 6.1 | 5' -ATGTAACYTTCAGGTGTGATCCAA-3'    |
| TCRBV 6.2 | 5' -GTGTGATCCAATTTTCAGGTCATAC-3'   |
| TCRBV 7   | 5' -TACGCAGACACCAARACACCTGGTCA-3'  |
| TCRBV 8   | 5' -GGTGACAGAGATGGGACAAGAAGT-3'    |
| TCRBV 9   | 5' -CCCAGACTCCAAAATACCTGGTCA-3'    |
| TCRBV 10  | 5' -AAGGTCACCCAGAGACCTAGACTT-3'    |
| TCRBV 11  | 5' -GATCACTCTGGAATGTTCTCAAACC-3'   |
| TCRBV 12  | 5' -CCAAGACACAAGGTCACAGAGACA-3'    |
| TCRBV 13  | 5' -GTGTCACTCAGACCCCAAATTC-3'      |
| TCRBV 14  | 5' -GTGACCCAGAACCCAAGATACCTC-3'    |
| TCRBV 15  | 5' -GTTACCCAGACCCCAAGGAATAGG-3'    |
| TCRBV 16  | 5' -ATAGAAGCTGGAGTTACTCAGTTC-3'    |
| TCRBV 17  | 5' -CACTCAGTCCCCAAAGTACCTGTT-3'    |
| TCRBV 18  | 5' -TGCAGAACCCAAGACACCTGGTCA-3'    |
| TCRBV 19  | 5' -ACAAAGATGGATTGTACCCCCGAA-3'    |
| TCRBV 20  | 5' -GTCAGATCTCAGACTATTCATCAATGG-3' |
| TCRBV 21  | 5' -CAGTCTCCAGATATAAGATTAYAGAG-3'  |
| TCRBV 22  | 5' -GGTCACACAGATGGGACAGGAAGT-3'    |
| TCRBV 23  | 5' -CTGATCAAAGAAAAGAGGGAAACAGCC-3' |

***TCRBV* and *TCRGV* primers (continued)**

|           |                                    |
|-----------|------------------------------------|
| TCRBV 24  | 5' -CAAGATACCAGGTTACCCAGTTTG-3'    |
| TCRBV 25  | 5' -GACAGAAAGCAAAAATTATATTGTGCC-3' |
| TCRBJ 1.2 | 5' -TACAACGGTTAACCTGGTCCCCGA-3'    |
| TCRBJ 1.3 | 5' -CACCTACAACAGTGAGCCAACCTT-3'    |
| TCRBJ 1.5 | 5' -CCAACCTACCTAGGATGGAGAGTCGA-3'  |
| TCRBJ 1.6 | 5' -CCTGGTCCCATTCCCAAAGTGGA-3'     |
| TCRBJ 2.2 | 5' -CCTTACCCAGTACGGTCAGCCTA-3'     |

TCRBJ 2.3 5' -TCCCGGGGCGCCCCCTCCCCAGTT-3'  
 TCRBJ 2.6 5' -CAGCCGCCGCTTCCACCTGAAT-3'  
 TCRBJ 2.7 5' -TCCATCGTTCACCTTCTCTCTAAACA-3'  
 TCRGV11 F 5' -TCAGGAGTTATAAGCATTACACC-3'  
 TCRGV1-9 F 5' -ACGGCGTCTTCAGTACTATGAC-3'  
 TCRGJ1 R 5' -TTACCAGGCGAAGTTACTATGAGC-3'  
 TCRGJ3 R 5' -GTGTTGTTCCACTGCCAAAGAG-3'

### **MYC and BCL6**

MYC1 F 5' -CACCGGCCCTTTATAATGCG-3'  
 MYC1 R 5' -CGATTCCAGGAGAATCGGAC-3'  
 MYC2 F 5' -CTTTGTGTGCCCCGCTCCAG-3'  
 MYC2 R 5' -GCGCTCAGATCCTGCAGGTA-3'  
 BCL6 F 5' -ATGCTTTGGCTCCAAGTT-3'  
 BCL6 R 5' -CACGATACTTCATCTCATC-3'

### **Human RT-PCR primers**

GAPDH F 5' -TTAGCACCCCTGGCCAAG-3'  
 GAPDH R 5' -CTTACTCCTTGGAGGCCATG-3'  
 BCR-ABL1 F 5' -ACCTCACCTCCAGCGAGGAGGACTT-3'  
 BCR-ABL1 R 5' -TCCACTGGCCACAAAATCATAACAGT-3'  
 AID F 5' -TGCTCTTCCTCCGCTACATC-3'  
 AID R 5' -CCTCATAACAGGGGCAAAGG-3'  
 ID2 F 5' -TACAACATGAACGACTGCTACTC-3'  
 ID2 R 5' -TTGCTGTCATTTGACATTAAGTC-3'

### **Mouse RT-PCR primers**

mAid F 5' - AAATGTCCGCTGGGCCAA-3'  
 mAid R 5' - CATCGACTTCGTACAAGGG-3'  
 mObf1 F 5' -AGCTCCCTGACCATTGAC-3'  
 mObf1 R 5' -CTGTCCCATCCCCCTGTAA-3'  
 mOct2 F 5' -ATCGAGACGAATGTCCGCTT-3'  
 mOct2 R 5' -GTAGCTGGTCCGCTTTCC-3'  
 mHprt 5' -GGGGGCTATAAGTTCTTTGC-3'  
 mHprt 5' -TCCAACACTTCGAGAGGTCC-3'

### **siRNA duplices**

Non-targeting siRNA 5' -UUGUACC UAAUUUCGUCCCAC-3'  
 3' -CAUGGAUUAAAGCAGGGUGUU-5'  
 AID siRNA 5' -UUGCUCUUCUCCGCUACAUC-3'  
 3' -CGAGAAGGAGGCGAUGUAGUU-5'

### **LM-PCR primers**

CDKN2A F 5' -CCAGGAATAAAAATAAGGGGAATA-3'  
 CDKN2A F2 5' -GGAATAAAAATAAGGGGAATAGGG-3'  
 CDKN2A R 5' -CTTTCCCTACCTGGTCTTCTAGG-3'  
 CDKN2B F1 5' -GTGAACATTCCCAAAATATTAGC-3'  
 CDKN2B F2 5' -AAAATATTAGCCTTGGCTTTACTG-3'  
 CDKN2B R 5' -AGACTCCTGTACAAATCTACATCG-3'  
 V3-21 R 5' -CTCTCGCACAGTAATACACAGC-3'  
 V1-2 R 5' -CTCTCGCACAGTAATACACGAC-3'

V1-69 R 5' -TCTCTCGCACAGTAATACACG-3'  
V3-73 R 5' -GGTTTTTCAGGCTGTTTCATTT-3'  
V3-53\_R 5' -CACCTTTTAAAATAGCAACAAGG-3'  
V3-30\_R 5' -AGCATAGCTACTGAAGGTGAAT-3'  
Linker F1 5' -CTGCTCGAATTCAAGCTTCT-3'  
Linker F2 5' -GCTTCTAACGATGTACGGGG-3'  
Linker R1 5' -GTACATCGTTAGAAGCTTGAA-3'  
Linker R2 5' -GTTAGAAGCTTGAATTCGAGC-3'
